# Supplementary material for: Frequency and characterization of mutations in genes in a large cohort of patients referred to MODY registry
Source: publisher site journal article supplement (doi:10.1515/jpem-2020-0501), 2021-04-13
Supplement: Supplementary file 1 [file j_jpem-2020-0501_suppl.docx]

**Supplemental Table 1:**

| **Gene** | **Variant** | **Proband ID** | **Sex of Proband** | **Self-Reported Ethnicity** | **Age at Diagnosis** | **A1C standardized (max A1C if several, >14 if 14 or higher** | **BMI Standardized** | **Antibodies** | **Antibody negative?** | **Number of antibodies** |
| --- | --- | --- | --- | --- | --- | --- | --- | --- | --- | --- |
| GCK | NM_000162:exon2:c.T56A:p.I19N | d948 | M | Caucasian | 9 | 6.6 | Normal | GAD, islet, insulin, and zinc transporter negative | Y | 4 |
| GCK | NM_000162:exon2:c.T122C:p.M41T | d528 | M | Hispanic | 14 | 6.2 | Normal | GAD positive, insulin and islet negative | y | 2 |
| GCK | NM_000162:exon2:c.C127A:p.R43S | d221 | F | Hispanic | 15 | 5.5 | Normal | islet, insulin neg | y | 2 |
| GCK | NM_000162:exon2:c.G130A:p.G44S | d776 | F | Caucasian | 4 | 6.2 | Normal | GAD, islet, and insulin negative | Y | 3 |
| GCK | NM_000162:exon2:c.C148T:p.H50Y | d293 | F | Hispanic | 7 | 6.3 | Normal | nd | n |  |
| GCK | NM_000162:exon2:c.A167C:p.K56T | d740 | F | Caucasian | 18 | 5.7 | Normal | GAD and islet negative | y | 2 |
| GCK | NM_000162:exon3:c.290dupG:p.G97fs | d746 | F | Caucasian | 8 | 6.6 | obese | GAD, islet, and insulin negative | y | 3 |
| GCK | NM_000162:exon3:c.295delT:p.W99fs | d930 | M | Caucasian | 24 | 6.5 | Normal | GAD, islet negative | y | 2 |
| GCK | NM_000162:exon4:c.A388G:p.I130V | d346 | F | two or more races | 15 |  | Unknown | nd | N |  |
| GCK | NM_000162:exon4:c.A388G:p.I130V (Pro29fs) | D137 | F | Hispanic | 29 | 5.6 | Unknown | nd | N |  |
| GCK | NM_000162:exon4:c.A463G:p.R155G | d712 | M | Caucasian | 22 | 6.4 | Overweight | reportedly negative | Y |  |
| GCK | NM_000162:exon4:c.G478A:p.D160N | d911 | F | Caucasian | 22 | 6.5 | Normal | GAD, islet, and insulin negative | Y | 3 |
| GCK | NM_000162:exon5:c.G544A:p.V182M | d377 | M | two or more races | 9 | 6.3 | Normal | GAD negative, rest reportedly negative | Y | 1 |
| GCK | NM_000162:exon5:c.C556T:p.R186X | d142 | F | Caucasian | 38 | 6.3 | unknown | nd | n |  |
| GCK | NM_000162:exon5:c.565insTATC:p.p.K190YfsTer8 | d186 | F | Caucasian | 34 |  | unknown | reportedly negative | y |  |
| GCK | NM_000162:exon5:c.G572A:p.R191Q | d900 | F | Caucasian | 13 |  | Normal | GAD, islet, insulin, and zinc transporter negative | y | 4 |
| GCK | NM_000162:exon6:c.A614G:p.D205G | d823 | F | Caucasian | 8 | 6.1 | Overweight | nd | N |  |
| GCK | NM_000162:exon6:c.A625C:p.T209P | d440 | F | Caucasian | 20 | 6.4 | Normal | GAD and islet cell negative | y | 2 |
| GCK | NM_000162:exon6:c.C626A:p.T209K | d736 | M | Caucasian | 22 |  | unknown | ND | N |  |
| GCK | NM_000162:exon6:c.C626T:p.T209M | d251 | M | Hispanic | 10 | 6.1 | Normal | nd | n |  |
| GCK | NM_000162:exon6:c.C645G:p.Y215X | d699 | F | Caucasian | 17 | 6.1 | Normal | Negative GAD, islet, and insulin | Y | 3 |
| GCK | NM_000162:exon6:c.T658A:p.C220S | d867 | F | Hispanic | 15 | 5.6 | unknown | GAD, insulin, and islet negative | y | 3 |
| GCK | NM_000162:exon6:c.C660A:p.C220X | d927 | M | Caucasian | 50 | 7 | overweight | nd | n |  |
| GCK | NM_000162:exon7:c.C683T:p.T228M | d638 | F | Caucasian | 17 | 6.6 | Normal | islet and GAD negative | Y | 2 |
| GCK | NM_000162:exon7:c.G706A:p.E236K | d322 | F | Caucasian | 31 |  | obese | nd | n |  |
| GCK | NM_000162:exon7:c.G736A:p.G246R | d364 | F | Hispanic | 3 | 5.80 | Unknown | GAD, islet, and insulin negative | Y | 3 |
| GCK | NM_000162:exon7:c.G773A:p.G258D | d124 | M | Hispanic | 7 | 6.8 | Normal | nd | n |  |
| GCK | NM_000162:exon7:c.G775A:p.A259T | d937 | M | two or more races | 15 | 6.5 | Normal | GAD, islet, and insulin negative | y | 3 |
| GCK | NM_000162:exon7:c.G814T:p.E272X | d388 | M | Hispanic | 12 | 7.5 | Normal | reportedly negative | Y |  |
| GCK | NM_000162:exon7:c.A860C:p.Q287P | d628 | F | Caucasian | 18 |  | unknown | nd | n |  |
| GCK | NM_000162:c.860+1G>A; splicing | d716 | F | Caucasian | 10 | 6.1 | overweight | nd | N |  |
| GCK | NM_000162:exon8:c.A872C:p.K291T | d413 | F | two or more races | 9 |  | Normal | nd | N |  |
| GCK | NM_000162:exon8:c.A872C:p.K291T | d566 | M | Hispanic | 41 | 6.5 | Unknown | GAD, islet, and insulin negative | Y | 3 |
| GCK | NM_000162:exon8:c.T917C:p.L306P | d115 | F | Caucasian | 14 | 6.3 | obese | reportedly negative | y |  |
| GCK | NM_000162:exon8:c.G952A:p.G318R | d926 | M | Caucasian | 6 | 6.4 | Overweight | islet negative | y | 1 |
| GCK | NM_000162:exon8:c.T989G:p.F330C | d754 | M | Caucasian | 4 | 5.9 | Normal | GAD, insulin negative | y | 2 |
| GCK | NM_000162.exon8:c.1019G>A, splicing.p.S340N | d167 | M | Hispanic | 5 | 6.8 | unknown | GAD and islet negative | y | 2 |
| GCK | NM_000162:exon9:c.T1121C:p.V374A | d148 | M | two or more races | 6 |  | Normal | nd | N |  |
| GCK | NM_000162:exon9:c.C1124A:p.S375Y | d205 | M | Caucasian | 15 | 6.1 | Overweight | GAD neg | y | 1 |
| GCK | NM_000162:exon9:c.C1148G:p.S383W | d182 | M | other | 11 | 6.2 | Normal | GAD and islet neg | Y | 2 |
| GCK | NM_000162:exon9:c.T1178C:p.M393T | 2134 | M | Caucasian | nd, but as child | 8.9 | normal | GAD, islet, and insulin negative | Y | 3 |
| GCK | NM_000162:exon9:c.G1225C:p.D409H | d895 | M | Caucasian | 9 |  | Normal | nd | n |  |
| GCK | NM_000162:exon10:c.1261delG:p.E421fs | d397 | F | Caucasian | 2 | 5.9 | underweight | nd | n |  |
| GCK | NM_000545:exon9:c.1735_1736insCGGCATCCAGCACCTGC:p.Q579fs | d410 | M | Asian | 47 | 6.6 | unknown | GAD and islet negative | y | 2 |
| HNF1A | NM_000545:exon1:c.G214T:p.D72Y | d709 | M | two or more races | 17 | 6.7 | obese | nd | N |  |
| HNF1A | NM_000545:exon3:c.C598T:p.R200W | d688 | F | Caucasian | 27 | 8.6 | Overweight | reportedly negative | Y |  |
| HNF1A | NM_000545:exon3:c.C598T:p.R200W | d876 | M | Caucasian | 34 | 7.6 | Normal | nd | n |  |
| HNF1A | NM_000545:exon3:c.T611A:p.F204Y | d850 | M | Caucasian | 14 | 6.6 | Overweight | GAD, islet cell negative | y | 2 |
| HNF1A | NM_000545:exon4:c.G812A:p.R271Q | d497 | M | Caucasian | 16 | 7.8 | overweight | nd | N |  |
| HNF1A | NM_000545:exon4:c.872delC:0p.P291fs | d942 | F | Caucasian | 11 | 9.1 | Overweight | reportedly negative | y |  |
| HNF1A | NM_000545:exon4:c.872dupC:p.P291fs | d894 | F | Caucasian | 15 | 6.2 | unknown | nd | n |  |
| HNF1A | NM_000545:exon6:c.1137delT:p.P379fs | d891 | M | two or more races | 9 | 9 | obese | reportedly negative | y |  |
| HNF1A | NM_000545:exon6:c.1137delT:p.P379fs | d248 | F | Caucasian | 10 | 6.8 | Normal | negative islet | y | 1 |
| HNF1A | NM_000545:exon7:c.G1501A:p.A501T | d175 | M | asian | 12 | 7 | unknown | reportedly negative | y |  |
| HNF1A | NM_000545:exon9:c.1735_1736insCGGCATCCAGCACCTGC:p.Q579fs | d401 | M | Caucasian | 17 | 6.2 | unknown | reportedly negative | y |  |
| HNF1A | NM_000545:exon10:c.T1885G:p.S629A | d199 | F | Caucasian | 18 | 6.4 | unknown | nd | n |  |
| HNF1B | NM_000458:exon4:c.A913G:p.K305E | d829 | F | Caucasian | 14 | 7.4 | Unknown | GAD and islet negative | Y | 2 |
| HNF4A | NM_000457:exon3:c.A376T:p.K126X | d771 | M | Hispanic | 18 |  | Normal | GAD, islet, and insulin negative | Y | 3 |
| KCNJ11 | NM_000525:exon1:c.G685A:p.E229K | d731 | F | Caucasian | 30 | 6.2 | overweight | nd | N |  |
| PDX1 | NM_000209:exon1:c.93delC:p.S31fs | d650 | M | Caucasian | 32 |  | Normal | nd | N |  |

- Supplemental Table 1- Variant Scoring and Interpretation by Proband
- This table characterizes probands and variant scoring by MetaSVM, SIFT, Polyphen 2, Mutation Asessor, Mutation Taster, GERP++, CADD store, and ACMG classification
- nd= not documented

**Supplemental Table 1 Extension:**

| **Gene** | **Variant** | **Family History** | **Number of Family Members Genetically Tested** | **Citation in Past Studies** | **ACMG classification** | **ACMG criteria** | **MetaSVM** | **SIFT** | **Poly-Phen2** | **CADD score** |
| --- | --- | --- | --- | --- | --- | --- | --- | --- | --- | --- |
| GCK | NM_000162:exon2:c.T56A:p.I19N | at least 3 generations | 1 | Estalella I, Rica I, Perez de Nanclares G, Bilbao JR, Vazquez JA, San Pedro JI, et al. Mutations in GCK and HNF-1alpha explain the majority of cases with clinical diagnosis of MODY in Spain. Clin Endocrinol (Oxf). 2007 Oct;67(4):538-46. | Likely pathogenic | PM1(Hexokinase, N-terminal) -- PM2(rare in gnomAD) -- PP1 (cosegregation) -- PP3(computational predicted pathogenic) | D | T | D | 25 |
| GCK | NM_000162:exon2:c.T122C:p.M41T | at least 2 generations | 6 | Osbak KK, Colclough K, Saint-Martin C, Beer NL, Bellanné-Chantelot C, Ellard S, et al. Update on mutations in glucokinase (GCK), which cause maturity-onset diabetes of the young, permanent neonatal diabetes, and hyperinsulinemic hypoglycemia. Hum Mutat. 2009 Nov;30(11):1512-26. | Likely pathogenic | PM1(Hexokinase, N-terminal) -- PM2(rare in gnomAD) -- PP1 (cosegregation) -- PP3(computational predicted pathogenic) -- PP5(weak pathogenic in ClinVar) | D | D | D | 25.7 |
| GCK | NM_000162:exon2:c.C127A:p.R43S | at least 2 generations | 3 | Osbak KK, Colclough K, Saint-Martin C, Beer NL, Bellanné-Chantelot C, Ellard S, et al. Update on mutations in glucokinase (GCK), which cause maturity-onset diabetes of the young, permanent neonatal diabetes, and hyperinsulinemic hypoglycemia. Hum Mutat. 2009 Nov;30(11):1512-26  Gragnoli C, Cockburn BN, Chiaramonte F, Gorini A, Marietti G, Marozzi G, et al. Early-onset Type II diabetes mellitus in Italian families due to mutations in the genes encoding hepatic nuclear factor 1 alpha and glucokinase. Diabetologia. 2001 Oct;44(10):1326-9. | Likely pathogenic | PM1(Hexokinase, N-terminal) -- PM2(rare in gnomAD) -- PP1 (cosegregation) -- PP3(computational predicted pathogenic) -- PP5(weak pathogenic in ClinVar) | D | D | D | 31 |
| GCK | NM_000162:exon2:c.G130A:p.G44S | at least 3 generations | 7 | Gragnoli C, Cockburn BN, Chiaramonte F, Gorini A, Marietti G, Marozzi G, et al. Early-onset Type II diabetes mellitus in Italian families due to mutations in the genes encoding hepatic nuclear factor 1 alpha and glucokinase. Diabetologia. 2001 Oct;44(10):1326-9.  Codner E, Rocha A, Deng L, Martínez-Aguayo A, Godoy C, Mericq V, et al. Mild fasting hyperglycemia in children: high rate of glucokinase mutations and some risk of developing type 1 diabetes mellitus. Pediatr Diabetes. 2009 Sep;10(6):382-8. | Likely pathogenic | PM1(Hexokinase, N-terminal) -- PM2(rare in gnomAD) -- PP1 (cosegregation) -- PP3(computational predicted pathogenic) | D | D | D | 34 |
| GCK | NM_000162:exon2:c.C148T:p.H50Y | at least 3 generations | 3 | Pollak C F, Lagos L M, Santos M JL, Poggi H, Urzúa C A, Rumié C H. [Diabetes mellitus caused by a mutation of glucokinase gene. Report of an affected family]. Rev Med Chil. 2017 Sep;145(9):1203-7. | Likely pathogenic | PM1(Hexokinase, N-terminal) -- PM2(rare in gnomAD) -- PP3(computational predicted pathogenic) | D | D | D | 26 |
| GCK | NM_000162:exon2:c.A167C:p.K56T | at least 2 generations | 1 | Novel | Likely pathogenic | PM1(Hexokinase, N-terminal) -- PM2(rare in gnomAD) -- PP3(computational predicted pathogenic) | D | D | D | 27.1 |
| GCK | NM_000162:exon3:c.290dupG:p.G97fs | at least 3 generations | 4 | Novel | Pathogenic | PVS1(frameshift) -- PM2(rare in gnomAD) -- PP1 (cosegregation) | . | . | . | . |
| GCK | NM_000162:exon3:c.295delT:p.W99fs | sibling | 1 | Sanyoura M, Letourneau L, Knight Johnson AE, Del Gaudio D, Greeley SAW, Philipson LH, et al. GCK-MODY in the US Monogenic Diabetes Registry: Description of 27 unpublished variants. Diabetes Res Clin Pract. 2019 May;151:231-6. | Pathogenic | PVS1(frameshift) -- PM2(rare in gnomAD) -- PP1 (cosegregation) -- PP5(weak pathogenic in ClinVar) | . | . | . | . |
| GCK | NM_000162:exon4:c.A388G:p.I130V | 3 generations | 18 | Novel | Likely pathogenic | PM1(Hexokinase, N-terminal) -- PM2(rare in gnomAD) -- PP1 (cosegregation) -- PP3(computational predicted pathogenic) | D | T | B | 15.82 |
| GCK | NM_000162:exon4:c.A388G:p.I130V (Pro29fs) | at least 2 generations | 4 | Novel | Likely pathogenic | PM1(Hexokinase, N-terminal) -- PM2(rare in gnomAD) | D | D | B | 15.48 |
| GCK | NM_000162:exon4:c.A463G:p.R155G | at least 2 generations | 2 | George DC, Chakraborty C, Haneef SA, Nagasundaram N, Chen L, Zhu H. Evolution- and structure-based computational strategy reveals the impact of deleterious missense mutations on MODY 2 (maturity-onset diabetes of the young, type 2). Theranostics. 2014;4(4):366-85. | Likely pathogenic | PM1(Hexokinase, N-terminal) -- PM2(rare in gnomAD) -- PP3(computational predicted pathogenic) -- PP5(weak pathogenic in ClinVar) | D | D | D | 24.8 |
| GCK | NM_000162:exon4:c.G478A:p.D160N | at least 2 generations | 1 | Raimondo A, Chakera AJ, Thomsen SK, Colclough K, Barrett A, De Franco E, et al. Phenotypic severity of homozygous GCK mutations causing neonatal or childhood-onset diabetes is primarily mediated through effects on protein stability. Hum Mol Genet. 2014 Dec 15;23(24):6432-40. | Likely pathogenic | PM1(Hexokinase, N-terminal) -- PM2(rare in gnomAD) -- PP3(computational predicted pathogenic) -- PP5(weak pathogenic in ClinVar) | D | D | D | 27.3 |
| GCK | NM_000162:exon5:c.G544A:p.V182M | silbling, grandparents but no parent | 5 | Ellard S, Lango Allen H, De Franco E, Flanagan SE, Hysenaj G, Colclough K, et al. Improved genetic testing for monogenic diabetes using targeted next-generation sequencing. Diabetologia. 2013 Sep;56(9):1958-63. | Pathogenic | PS1(known pathogenic in ClinVar) -- PM1(Hexokinase, N-terminal) -- PM2(rare in gnomAD) -- PP1 (cosegregation) -- PP3(computational predicted pathogenic) | D | D | D | 34 |
| GCK | NM_000162:exon5:c.C556T:p.R186X | at least 2 generations | 7 | Wright CF, West B, Tuke M, Jones SE, Patel K, Laver TW, et al. Assessing the Pathogenicity, Penetrance, and Expressivity of Putative Disease-Causing Variants in a Population Setting. Am J Hum Genet. 2019 02 7;104(2):275-86. | Pathogenic | PVS1(stop-gained) -- PM1(Hexokinase, N-terminal) -- PM2(rare in gnomAD) -- PP1 (cosegregation) -- PP5(weak pathogenic in ClinVar) | . | . | . | 35 |
| GCK | NM_000162:exon5:c.565insTATC:p.p.K190YfsTer8 | at least 2 generations | 3 | Novel | Pathogenic | PVS1(frameshift) -- PM2(rare in gnomAD) | . | . | . | . |
| GCK | NM_000162:exon5:c.G572A:p.R191Q | at least 2 generations | 4 | Codner E, Deng L, Pérez-Bravo F, Román R, Lanzano P, Cassorla F, et al. Glucokinase mutations in young children with hyperglycemia. Diabetes Metab Res Rev. 2006 Sep-Oct;22(5):348-55.  Li X, Ting TH, Sheng H, Liang CL, Shao Y, Jiang M, et al. Genetic and clinical characteristics of Chinese children with Glucokinase-maturity-onset diabetes of the young (GCK-MODY). BMC Pediatr. 2018 03 6;18(1):101. | Likely pathogenic | PM1(Hexokinase, N-terminal) -- PM2(rare in gnomAD) -- PP3(computational predicted pathogenic) -- PP5(weak pathogenic in ClinVar) | D | D | D | 35 |
| GCK | NM_000162:exon6:c.A614G:p.D205G | at least 2 generations | 1 | Novel | Likely pathogenic | PM1(Hexokinase, N-terminal) -- PM2(rare in gnomAD) -- PP1 (cosegregation) -- PP3(computational predicted pathogenic) | D | D | D | 28.4 |
| GCK | NM_000162:exon6:c.A625C:p.T209P | at least 2 generations | 5 | Novel | Likely pathogenic | PM1(Hexokinase, N-terminal) -- PM2(rare in gnomAD) -- PP1 (cosegregation) -- PP3(computational predicted pathogenic) | D | D | D | 28.3 |
| GCK | NM_000162:exon6:c.C626A:p.T209K | at least 3 generations | 2 | Pruhova S, Dusatkova P, Sumnik Z, Kolouskova S, Pedersen O, Hansen T, et al. Glucokinase diabetes in 103 families from a country-based study in the Czech Republic: geographically restricted distribution of two prevalent GCK mutations. Pediatr Diabetes. 2010 Dec;11(8):529-35. | Likely pathogenic | PM1(Hexokinase, N-terminal) -- PM2(rare in gnomAD) -- PP3(computational predicted pathogenic) | D | D | D | 34 |
| GCK | NM_000162:exon6:c.C626T:p.T209M | at least 3 generations | 5 | Estalella I, Rica I, Perez de Nanclares G, Bilbao JR, Vazquez JA, San Pedro JI, et al. Mutations in GCK and HNF-1alpha explain the majority of cases with clinical diagnosis of MODY in Spain. Clin Endocrinol (Oxf). 2007 Oct;67(4):538-46.  Giuffrida FMA, Moises RS, Weinert LS, Calliari LE, Manna TD, Dotto RP, et al. Maturity-onset diabetes of the young (MODY) in Brazil: Establishment of a national registry and appraisal of available genetic and clinical data. Diabetes Res Clin Pract. 2017 Jan;123:134-42. | Likely pathogenic | PM1(Hexokinase, N-terminal) -- PM2(rare in gnomAD) -- PP1 (cosegregation) -- PP3(computational predicted pathogenic) | D | D | D | 33 |
| GCK | NM_000162:exon6:c.C645G:p.Y215X | at least 2 generations | 3 | Sagen JV, Odili S, Bjørkhaug L, Zelent D, Buettger C, Kwagh J, et al. From clinicogenetic studies of maturity-onset diabetes of the young to unraveling complex mechanisms of glucokinase regulation. Diabetes. 2006 Jun;55(6):1713-22. | Pathogenic | PVS1(stop-gained) -- PS1(known pathogenic in ClinVar) -- PM1(Hexokinase, N-terminal) -- PM2(rare in gnomAD) -- PP1 (cosegregation) | . | . | . | 27.1 |
| GCK | NM_000162:exon6:c.T658A:p.C220S | grandparents, but no parents | 1 | Caetano LA, Jorge AA, Malaquias AC, Trarbach EB, Queiroz MS, Nery M, et al. Incidental mild hyperglycemia in children: two MODY 2 families identified in Brazilian subjects. Arq Bras Endocrinol Metabol. 2012 Nov;56(8):519-24. | Likely pathogenic | PM1(Hexokinase, C-terminal) -- PM2(rare in gnomAD) -- PP3(computational predicted pathogenic) -- PP5(weak pathogenic in ClinVar) | D | D | P | 25.7 |
| GCK | NM_000162:exon6:c.C660A:p.C220X | at least 2 generations | 1 | Novel | Pathogenic | PVS1(stop-gained) -- PM1(Hexokinase, C-terminal) -- PM2(rare in gnomAD) -- PP3(computational predicted pathogenic) | . | . | . | 39 |
| GCK | NM_000162:exon7:c.C683T:p.T228M | at least 3 generations | 1 | Yokota I, Moritani M, Nishisho K, Miyoshi T, Kotani Y, Kagami S. Detection of glucokinase gene defects in non-obese Japanese children diagnosed with diabetes by school medical examinations. Endocr J. 2011;58(9):741-6. | Pathogenic | PS1(known pathogenic in ClinVar) -- PM1(Hexokinase, C-terminal) -- PM2(rare in gnomAD) -- PP3(computational predicted pathogenic) | D | D | D | 28.7 |
| GCK | NM_000162:exon7:c.G706A:p.E236K | at least 4 generations | 16 | Alkorta-Aranburu G, Carmody D, Cheng YW, Nelakuditi V, Ma L, Dickens JT, et al. Phenotypic heterogeneity in monogenic diabetes: the clinical and diagnostic utility of a gene panel-based next-generation sequencing approach. Mol Genet Metab. 2014 Dec;113(4):315-20. | Likely pathogenic | PM1(Hexokinase, C-terminal) -- PM2(rare in gnomAD) -- PP1 (cosegregation) -- PP3(computational predicted pathogenic) -- PP5(weak pathogenic in ClinVar) | D | D | D | 33 |
| GCK | NM_000162:exon7:c.G736A:p.G246R | at least 3 generations | 7 | Osbak KK, Colclough K, Saint-Martin C, Beer NL, Bellanné-Chantelot C, Ellard S, et al. Update on mutations in glucokinase (GCK), which cause maturity-onset diabetes of the young, permanent neonatal diabetes, and hyperinsulinemic hypoglycemia. Hum Mutat. 2009 Nov;30(11):1512-26. | Likely pathogenic | PM1(Hexokinase, C-terminal) -- PM2(rare in gnomAD) -- PP1 (cosegregation) -- PP3(computational predicted pathogenic) | D | D | B | 23.8 |
| GCK | NM_000162:exon7:c.G773A:p.G258D | at least 3 generations | 6 | Codner E, Deng L, Pérez-Bravo F, Román R, Lanzano P, Cassorla F, et al. Glucokinase mutations in young children with hyperglycemia. Diabetes Metab Res Rev. 2006 Sep-Oct;22(5):348-55. | Likely pathogenic | PM1(Hexokinase, C-terminal) -- PM2(rare in gnomAD) -- PP1 (cosegregation) -- PP3(computational predicted pathogenic) | D | D | D | 29 |
| GCK | NM_000162:exon7:c.G775A:p.A259T | uncle, but not parent | 2 | Ludovico O, Carella M, Bisceglia L, Basile G, Mastroianno S, Palena A, et al. Identification and Clinical Characterization of Adult Patients with Multigenerational Diabetes Mellitus. PLoS One. 2015;10(8):e0135855.  Capuano M, Garcia-Herrero CM, Tinto N, Carluccio C, Capobianco V, Coto I, et al. Glucokinase (GCK) mutations and their characterization in MODY2 children of southern Italy. PLoS One. 2012;7(6):e38906. | Likely pathogenic | PM1(Hexokinase, C-terminal) -- PM2(rare in gnomAD) -- PP3(computational predicted pathogenic) -- PP5(weak pathogenic in ClinVar) | D | D | P | 33 |
| GCK | NM_000162:exon7:c.G814T:p.E272X | at least 4 generations | 4 | Novel | Pathogenic | PVS1(stop-gained) -- PM1(Hexokinase, C-terminal) -- PM2(rare in gnomAD) -- PP1 (cosegregation) -- PP3(computational predicted pathogenic) | . | . | . | 41 |
| GCK | NM_000162:exon7:c.A860C:p.Q287P | at least 4 generations | 4 | Novel | Likely pathogenic | PM1(Hexokinase, C-terminal) -- PM2(rare in gnomAD) -- PP1 (cosegregation) -- PP3(computational predicted pathogenic) | D | D | D | 27.4 |
| GCK | NM_000162:c.860+1G>A; splicing | at least 4 generations | 1 | Submitted to ClinVar by Athena Diagnostics Inc | Likely pathogenic | PVS1 (splice) PM2(rare in gnomAD) -- PP1 (cosegregation) -- | . | . | . | 26.5 |
| GCK | NM_000162:exon8:c.A872C:p.K291T | at least 3 generations | 5 | Costantini S, Malerba G, Contreas G, Corradi M, Marin Vargas SP, Giorgetti A, et al. Genetic and bioinformatics analysis of four novel GCK missense variants detected in Caucasian families with GCK-MODY phenotype. Clin Genet. 2015 May;87(5):440-7. | Likely pathogenic | PM1(Hexokinase, C-terminal) -- PM2(rare in gnomAD) -- PP1 (cosegregation) -- PP3(computational predicted pathogenic) | D | D | D | 24.3 |
| GCK | NM_000162:exon8:c.A872C:p.K291T | 3 generations | 4 | Costantini S, Malerba G, Contreas G, Corradi M, Marin Vargas SP, Giorgetti A, et al. Genetic and bioinformatics analysis of four novel GCK missense variants detected in Caucasian families with GCK-MODY phenotype. Clin Genet. 2015 May;87(5):440-7. | Likely pathogenic | PM1(Hexokinase, C-terminal) -- PM2(rare in gnomAD) -- PP1 (cosegregation) -- PP3(computational predicted pathogenic) | D | D | D | 24.3 |
| GCK | NM_000162:exon8:c.T917C:p.L306P | at least 3 generations | 6 | Submitted to ClinVar by Integrated Genetics/Laboratory Corporation of America | Likely pathogenic | PM1(Hexokinase, C-terminal) -- PM2(rare in gnomAD) -- PP1 (cosegregation) -- PP3(computational predicted pathogenic) -- PP5(weak pathogenic in ClinVar) | D | D | D | 28.3 |
| GCK | NM_000162:exon8:c.G952A:p.G318R | at least 4 generations | 3 | Dusatkova P, Pruhova S, Borowiec M, Vesela K, Antosik K, Lebl J, et al. Ancestral mutations may cause a significant proportion of GCK-MODY. Pediatr Diabetes. 2012 Sep;13(6):489-98.  Wędrychowicz A, Tobór E, Wilk M, Ziółkowska-Ledwith E, Rams A, Wzorek K, et al. Phenotype Heterogeneity in Glucokinase-Maturity-Onset Diabetes of the Young (GCK-MODY) Patients. J Clin Res Pediatr Endocrinol. 2017 Sep 1;9(3):246-52. | Likely pathogenic | PM1(Hexokinase, C-terminal) -- PM2(rare in gnomAD) -- PP1 (cosegregation) -- PP3(computational predicted pathogenic) -- PP5(weak pathogenic in ClinVar) | D | D | D | 27.2 |
| GCK | NM_000162:exon8:c.T989G:p.F330C | grandparents, but no parents | 3 | Novel | Likely pathogenic | PM1(Hexokinase, C-terminal) -- PM2(rare in gnomAD) -- PM6 (de novo) -- PP3(computational predicted pathogenic) | D | D | D | 24.3 |
| GCK | NM_000162.exon8:c.1019G>A, splicing.p.S340N | at least 3 generations | 3 | Delvecchio M, Mozzillo E, Salzano G, Iafusco D, Frontino G, Patera PI, et al. Monogenic Diabetes Accounts for 6.3% of Cases Referred to 15 Italian Pediatric Diabetes Centers During 2007 to 2012. J Clin Endocrinol Metab. 2017 06 1;102(6):1826-34. | Likely pathogenic | PM2(rare in gnomAD) -- PP1 (cosegregation) -- PP3(computational predicted pathogenic) |  |  |  |  |
| GCK | NM_000162:exon9:c.T1121C:p.V374A | at least 2 generations | 7 | Novel | Likely pathogenic | PM1(Hexokinase, C-terminal) -- PM2(rare in gnomAD) -- PP1 (cosegregation) -- PP3(computational predicted pathogenic) | D | T | D | 34 |
| GCK | NM_000162:exon9:c.C1124A:p.S375Y | at least 3 generations | 2 | Novel | Likely pathogenic | PM1(Hexokinase, C-terminal) -- PM2(rare in gnomAD) -- PP1 (cosegregation) -- PP3(computational predicted pathogenic) -- PP5(weak pathogenic in ClinVar) | D | D | D | 32 |
| GCK | NM_000162:exon9:c.C1148G:p.S383W | at least 4 generations | 4 | Novel | Likely pathogenic | PM1(Hexokinase, C-terminal) -- PM2(rare in gnomAD) -- PP1 (cosegregation) -- PP3(computational predicted pathogenic) | D | D | D | 21.6 |
| GCK | NM_000162:exon9:c.T1178C:p.M393T | at least 3 generations | 7 | Haliloglu B, Hysenaj G, Atay Z, Guran T, Abalı S, Turan S, et al. GCK gene mutations are a common cause of childhood-onset MODY (maturity-onset diabetes of the young) in Turkey. Clin Endocrinol (Oxf). 2016 09;85(3):393-9. | Likely pathogenic | PM1(Hexokinase, C-terminal) -- PM2(rare in gnomAD) -- PP1 (cosegregation) -- PP3(computational predicted pathogenic) | D | T | P | 27.8 |
| GCK | NM_000162:exon9:c.G1225C:p.D409H | at least 3 generations | 2 | Novel | Likely pathogenic | PM1(Hexokinase, C-terminal) -- PM2(rare in gnomAD) -- PP3(computational predicted pathogenic) | D | D | D | 33 |
| GCK | NM_000162:exon10:c.1261delG:p.E421fs | at least 3 generations | 2 | Vits L, Beckers D, Craen M, de Beaufort C, Vanfleteren E, Dahan K, et al. Identification of novel and recurrent glucokinase mutations in Belgian and Luxembourg maturity onset diabetes of the young patients. Clin Genet. 2006 Oct;70(4):355-9. | Pathogenic | PVS1(frameshift) -- PM2(rare in gnomAD) | . | . | . | . |
| GCK | NM_000545:exon9:c.1735_1736insCGGCATCCAGCACCTGC:p.Q579fs | at least 2 generations | 2 | Wajngot A, Alvarsson M, Glaser A, Efendic S, Luthman H, Grill V. Glucose potentiation of arginine-induced insulin secretion is impaired in subjects with a glucokinase Glu256Lys mutation. Diabetes. 1994 Dec;43(12):1402-6. | Pathogenic | PVS1(frameshift) -- PM2(rare in gnomAD) | D | D | D | 34 |
| HNF1A | NM_000545:exon1:c.G214T:p.D72Y | 2 generations | 3 | Novel | Likely pathogenic | PM1(Hepatocyte nuclear factor 1, N-terminal) -- PM2(rare in gnomAD) -- PM6 (de novo) -- PP3(computational predicted pathogenic) | D | D | D | 19.38 |
| HNF1A | NM_000545:exon3:c.C598T:p.R200W | at least 3 generations | 1 | Docena MK, Faiman C, Stanley CM, Pantalone KM. Mody-3: novel HNF1A mutation and the utility of glucagon-like peptide (GLP)-1 receptor agonist therapy. Endocr Pract. 2014 Feb;20(2):107-11. | Likely pathogenic | PM1(Homeobox domain;Homeodomain-like) -- PM2(rare in gnomAD) -- PP3(computational predicted pathogenic) -- PP5(weak pathogenic in ClinVar) | D | D | D | 26.7 |
| HNF1A | NM_000545:exon3:c.C598T:p.R200W | at least 3 generations | 1 | Docena MK, Faiman C, Stanley CM, Pantalone KM. Mody-3: novel HNF1A mutation and the utility of glucagon-like peptide (GLP)-1 receptor agonist therapy. Endocr Pract. 2014 Feb;20(2):107-11.  Giuffrida FMA, Moises RS, Weinert LS, Calliari LE, Manna TD, Dotto RP, et al. Maturity-onset diabetes of the young (MODY) in Brazil: Establishment of a national registry and appraisal of available genetic and clinical data. Diabetes Res Clin Pract. 2017 Jan;123:134-42. | Likely pathogenic | PM1(Homeobox domain;Homeodomain-like) -- PM2(rare in gnomAD) -- PP3(computational predicted pathogenic) -- PP5(weak pathogenic in ClinVar) | D | D | D | 26.7 |
| HNF1A | NM_000545:exon3:c.T611A:p.F204Y | sibling | 2 | Colclough K, Bellanne-Chantelot C, Saint-Martin C, Flanagan SE, Ellard S. Mutations in the genes encoding the transcription factors hepatocyte nuclear factor 1 alpha and 4 alpha in maturity-onset diabetes of the young and hyperinsulinemic hypoglycemia. Hum Mutat. 2013 May;34(5):669-85.   Thanabalasingham G, Huffman JE, Kattla JJ, Novokmet M, Rudan I, Gloyn AL, et al. Mutations in HNF1A result in marked alterations of plasma glycan profile. Diabetes. 2013 Apr;62(4):1329-37. | Likely pathogenic | PM1(Homeobox domain;Homeodomain-like) -- PM2(rare in gnomAD) -- PP1 (cosegregation) -- PP3(computational predicted pathogenic) | D | D | D | 25.8 |
| HNF1A | NM_000545:exon4:c.G812A:p.R271Q | at least 3 generations | 2 | Bansal V, Gassenhuber J, Phillips T, Oliveira G, Harbaugh R, Villarasa N, et al. Spectrum of mutations in monogenic diabetes genes identified from high-throughput DNA sequencing of 6888 individuals. BMC Med. 2017 12 6;15(1):213.  Radha V, Ek J, Anuradha S, Hansen T, Pedersen O, Mohan V. Identification of novel variants in the hepatocyte nuclear factor-1alpha gene in South Indian patients with maturity onset diabetes of young. J Clin Endocrinol Metab. 2009 Jun;94(6):1959-65. | Likely pathogenic | PM1(Homeobox domain;Homeodomain-like) -- PM2(rare in gnomAD) -- PP1 (cosegregation) -- PP3(computational predicted pathogenic) -- PP5(weak pathogenic in ClinVar) | D | D | D | 34 |
| HNF1A | NM_000545:exon4:c.872delC:0p.P291fs | at least 3 generations | 1 | Klupa T, Warram JH, Antonellis A, Pezzolesi M, Nam M, Malecki MT, et al. Determinants of the development of diabetes (maturity-onset diabetes of the young-3) in carriers of HNF-1alpha mutations: evidence for parent-of-origin effect. Diabetes Care. 2002 Dec;25(12):2292-301. | Pathogenic | PVS1(frameshift) -- PM2(rare in gnomAD) |  |  |  |  |
| HNF1A | NM_000545:exon4:c.872dupC:p.P291fs | at least 3 generations | 1 | Simms RJ, Sayer JA, Quinton R, Walker M, Ellard S, Goodship TH. Monogenic diabetes, renal dysplasia and hypopituitarism: a patient with a HNF1A mutation. QJM. 2011 Oct;104(10):881-3. | Pathogenic | PVS1(frameshift) -- PM2(rare in gnomAD) | . | . | . | . |
| HNF1A | NM_000545:exon6:c.1137delT:p.P379fs | at least 3 generations | 3 | Bellanné-Chantelot C, Carette C, Riveline JP, Valéro R, Gautier JF, Larger E, et al. The type and the position of HNF1A mutation modulate age at diagnosis of diabetes in patients with maturity-onset diabetes of the young (MODY)-3. Diabetes. 2008 Feb;57(2):503-8.   Maraschin Jde F, Kannengiesser C, Murussi N, Campagnolo N, Canani LH, Gross JL, et al. HNF1alpha mutations are present in half of clinically defined MODY patients in South-Brazilian individuals. Arq Bras Endocrinol Metabol. 2008 Nov;52(8):1326-31. | Pathogenic | PVS1(frameshift) -- PM2(rare in gnomAD) -- PP1 (cosegregation) | . | . | . | . |
| HNF1A | NM_000545:exon6:c.1137delT:p.P379fs | grandparents, but no parents | 2 | Submitted to ClinVar by multiple submitters | Pathogenic | PVS1(frameshift) -- PM2(rare in gnomAD) -- PP1 (cosegregation) | . | . | . | . |
| HNF1A | NM_000545:exon7:c.G1501A:p.A501T | at least 2 generations | 3 | Owen KR, Stride A, Ellard S, Hattersley AT. Etiological investigation of diabetes in young adults presenting with apparent type 2 diabetes. Diabetes Care. 2003 Jul;26(7):2088-93. | Likely pathogenic | PM1(Hepatocyte nuclear factor 1, beta isoform, C-terminal) -- PM2(rare in gnomAD) -- PP1 (cosegregation) -- PP3(computational predicted pathogenic) | T | T | P | 22.2 |
| HNF1A | NM_000545:exon9:c.1735_1736insCGGCATCCAGCACCTGC:p.Q579fs | at least 3 generations | 1 | Bansal V, Gassenhuber J, Phillips T, Oliveira G, Harbaugh R, Villarasa N, et al. Spectrum of mutations in monogenic diabetes genes identified from high-throughput DNA sequencing of 6888 individuals. BMC Med. 2017 12 6;15(1):213. | Pathogenic | PVS1(frameshift) -- PM2(rare in gnomAD) | . | . | . | . |
| HNF1A | NM_000545:exon10:c.T1885G:p.S629A | at least 3 generations | 1 | Novel | Likely pathogenic | PM1(Hepatocyte nuclear factor 1, alpha isoform C-terminal) -- PM2(rare in gnomAD) -- PP3(computational predicted pathogenic) | D | D | P | 26.6 |
| HNF1B | NM_000458:exon4:c.A913G:p.K305E | at least 3 generations | 1 | Novel | Likely pathogenic | PM1(Homeobox domain;Homeodomain-like) -- PM2(rare in gnomAD) -- PP3(computational predicted pathogenic) | D | D | D | 26.7 |
| HNF4A | NM_000457:exon3:c.A376T:p.K126X | 3 generations, no parents | 1 | Novel | Pathogenic | PVS1(stop-gained) -- PM1(Nuclear hormone receptor, ligand-binding;Zinc finger, NHR/GATA-type/nuclear hormone receptor-type) -- PM2(rare in gnomAD) -- PP3(computational predicted pathogenic) | . | T | . | 38 |
| KCNJ11 | NM_000525:exon1:c.G685A:p.E229K | at least 4 generations (with consanguinity) | 6 | Girard CA, Shimomura K, Proks P, Absalom N, Castano L, Perez de Nanclares G, et al. Functional analysis of six Kir6.2 (KCNJ11) mutations causing neonatal diabetes. Pflugers Arch. 2006 Dec;453(3):323-32. | Likely pathogenic | PM1(Immunoglobulin E-set;Potassium channel, inwardly rectifying, Kir, cytoplasmic) -- PM2(rare in gnomAD) -- PP1 (cosegregation) -- PP3(computational predicted pathogenic) -- PP5(weak pathogenic in ClinVar) | D | D | D | 32 |
| PDX1 | NM_000209:exon1:c.93delC:p.S31fs | at least 3 generations | 1 | Novel | Pathogenic | PVS1(frameshift) -- PM2(rare in gnomAD) | . | . | . | . |

- Supplemental Table 1- Variant Scoring and Interpretation by Proband
- This table characterizes probands and variant scoring by MetaSVM, SIFT, Polyphen 2, CADD score, and ACMG classification

MetaSVM- D: Deleterious; T: Tolerated

SIFT- D: Deleterious, T: Tolerated

Polyphen 2- D: Probably damaging P: Possibly damaging), B: benign

CADD score- ranges from 1 to 99 (Higher score ‐> Greater deleteriousness)
